# Supplementary material
Source: PubMed Central journal article supplement (PMC5554722)
Supplement: NIHMS888883-supplement-2.pdf [file NIHMS888883-supplement-2.pdf]

**Endogenous wbp2n1 5'UTR and ORF:**

5' **GTGCGCAGGGAGAAGTTGAAGGCTTTAGTGC**GAGATGTCACTCAATAAGGACCACTCTCAGG-3'  
CCTCTTCAACTTCCGAAATCACGCT**CTACAGTGAGTTATTCCTGGTGAGA**

5' **AGAAAAGCTCATTCTGAAGAGGACTTGAATTCG**ATGTCACTCAATAAGGACCACTCTCAGG-3'

5' **myc-wbp2n1 (rescue)**
