# Supplementary material
Source: PubMed Central journal article supplement (PMC5554722)
Supplement: NIHMS888883-supplement-5.pdf [file NIHMS888883-supplement-5.pdf]

**Supplemental Figure 1:** Phylogenetic Tree for Wbp2 and Wbp2nl orthologues. Tree analysis shows that the Wbp/Wbp2nl proteins separate into two clades across several vertebrate taxa (Homo=human; mus=mouse; anolis and alligator = reptiles; Falco = falcon (bird); Danio = zebrafish; X. Laev and X. trop = amphibian). Mammalian WBP2NL (human, mouse) do not tightly cluster with the homologous proteins of the other vertebrates. Numbers on branches are Bootstrap Values. Protein identifiers are: Human\_Wbp2nl - AAH22546.1, Mus\_Wbp2nl - NP\_083342.1, Alligator\_Wbp2 - XP\_014372734.1, Falco\_Wbp2 - XP\_014142228.1, Anolis\_Wbp2 - XP\_014142228.1, Mus\_Wbp2 - AAH55058.1, Homo\_Wbp2 - AAH10616.1, X.laev.\_Wbp2 - NP\_001083140.1, X.trop.\_Wbp2 - AAH88817.1, Danio\_Wbp2 - AAH95106.1, X.laev.\_Wbp2nl - NP\_001088037.1, X.trop.\_Wbp2nl = NP\_001107397.1, Anolis\_Wbp2nl - XP\_008108972.1, Falco\_Wbp2nl - XP\_014137125.1, Alligator\_Wbp2nl - XP\_006027702.1, Danio\_Wbp2nl - NP\_956004.1.

**Supplemental Figure 2:** Wbp2nl MO sequences and their alignment to mRNAs. Top: Sequence of the endogenous *wbp2nl* mRNA including 5'UTR (green) and ORF (black). Translational start site is underlined. Middle: Sequences of the two MOs used in the described studies (MO#1 = blue; MO#2 = red). They are perfectly complementary to the endogenous mRNA. Bottom: *wbp2nl* ORF is preceded by 6 in-frame copies of the *myc* epitope sequence. Thus, in the rescue mRNA, the *wbp2nl* ORF is preceded by a long *myc* sequence (part of which is shown in lavender), the translational start site of which is 350 base pairs upstream of the binding site of MO#2. In addition, MO#1 is not complementary to this mRNA. Thus, the rescue mRNA is resistant to MO-mediated

knock-down, as demonstrated in Supplemental Figure 3.

**Supplemental Figure 3:** Wbp2nl MOs are effective and specific. **(A)** *wbp2nl* mRNA consisting of the endogenous 5'UTR and ORF followed by a 3' HA tag is abundantly expressed in the absence of MO#1 + MO#2 (left two lanes), but is not detected in the presence of the MOs (middle two lanes). Uninj = lysate from uninjected oocytes. **(B)** the rescue *wbp2nl* mRNA, consisting of 6 copies of the myc epitope in-frame with the *wbp2nl* ORF is abundantly expressed in both absence (left two lanes) and presence (middle two lanes) of MO#1 + MO#2. See Supplemental Figure 1 for sequence of this “rescue” mRNA. **(C)** Left: Two examples of the rescue of the diminished *foxd3* domain and expanded neural plate domain (red and black bars) after co-expression of an MO-resistant *wbp2nl* mRNA (rescue) with the Wbp2nl MOs (10/10 embryos showed rescue). Right: Two examples of the rescue of the expanded *sox2* neural plate domain after co-expression of an MO-resistant *wbp2nl* mRNA (rescue) with the Wbp2nl MOs (11/15 embryos showed rescue).

**Supplemental Figure 4:** *Xenopus* Wbp2nl (colored amino acids) contains several predicted sites of phosphorylation (underlined) many of which are contained within motifs (black letters with phosphorylation site in bold) characteristic of a number of kinases (listed on left margin).
