# Supplementary material
Source: PubMed Central journal article supplement (PMC5554722)

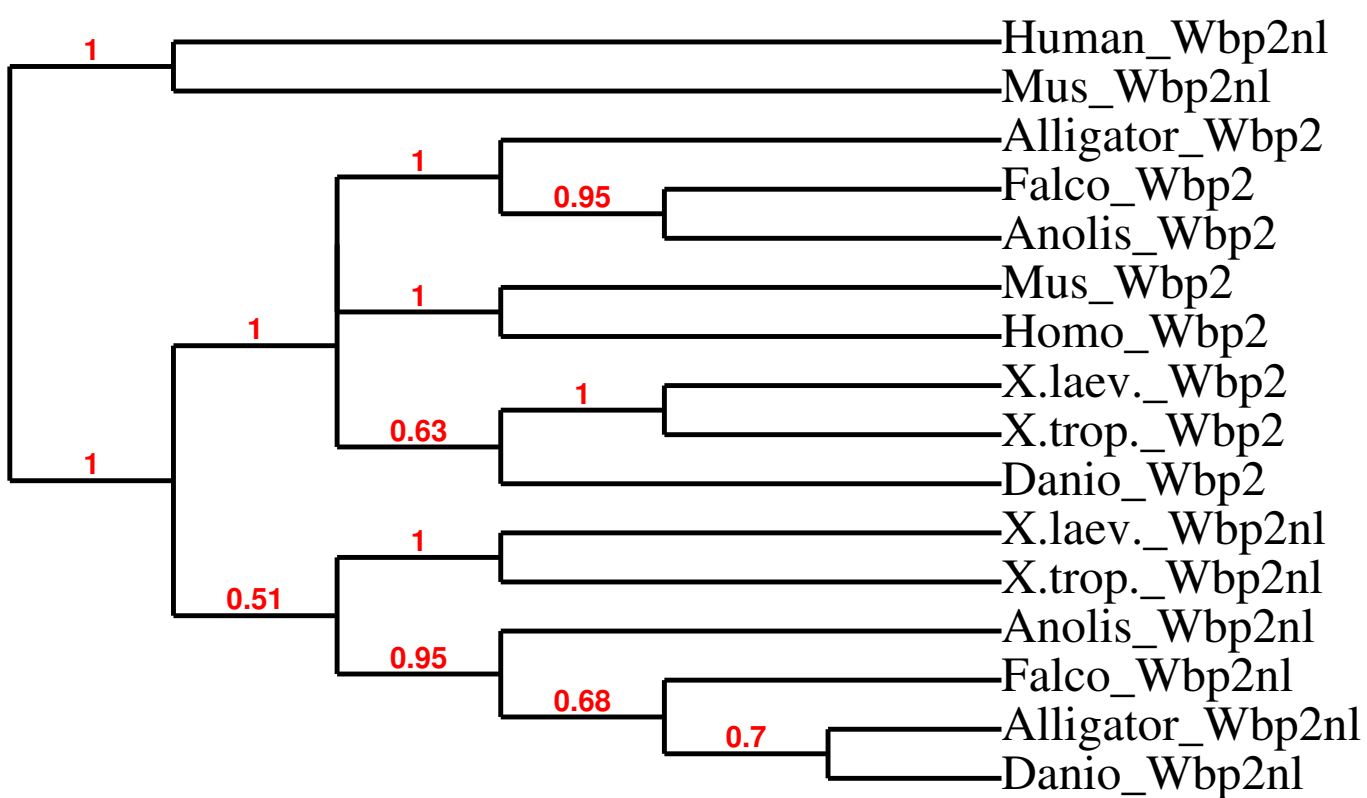

Supplement: NIHMS888883-supplement-1.pdf [file NIHMS888883-supplement-1.pdf]
